# Supplementary material for: Fabrication of pH-Sensitive Tetramycin Releasing Gel and Its Antibacterial Bioactivity against Ralstonia solanacearum
Source: MDPI journal article supplement (doi:10.3390/molecules24193606), 2019-10-07
Supplement: s1 [file s1]

## Supporting Information

# Fabrication of pH-Sensitive Tetramycin Releasing Gel and Its Antibacterial Bioactivity against *Ralstonia solanacearum*

Xiaozhou Ma <sup>1,2,†</sup>, Shunyu Xiang <sup>2,3,†</sup>, Huijun Xie <sup>3</sup>, Linhai He <sup>1</sup>, Xianchao Sun <sup>2,3</sup>, Yongqiang Zhang <sup>2,3,\*</sup> and Jin Huang <sup>1,2,\*</sup>

<sup>1</sup> School of Chemistry and Chemical Engineering, Southwest University, Chongqing 400715, China; maxiaozhou@swu.edu.cn (X.M.); h996130557@163.com (L.H.)

<sup>2</sup> Chongqing Key Laboratory of Soft-Matter Material Chemistry and Function Manufacturing, Southwest University, Chongqing 400715 China; xiangshunyu0325@163.com (S.X.); sunxianchao@163.com (X.S.)

<sup>3</sup> College of Plant Protection, State Cultivation Base of Crop Stress Biology for Southern Mountainous Land, Southwest University, Chongqing 400715 China; xiehj941019@163.com (H.X)

<sup>†</sup> The authors contributed equally to this work.

<sup>\*</sup> Correspondence: zyqiang@swu.edu.cn (Y.Z.); huangjin2015@swu.edu.cn (J.H.)

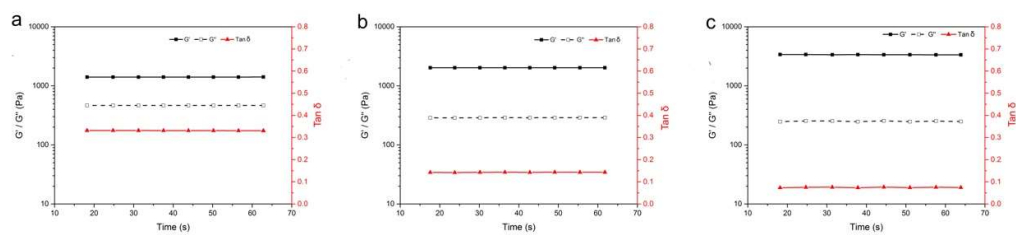

**Figure S1.** The storage modulus ( $G'$ ), loss modulus ( $G''$ ) and  $\tan \delta$  of the gel with (a)  $n\text{ADH}/n\text{CHO} = 0.3$ , (b)  $n\text{ADH}/n\text{CHO} = 0.4$  and (c)  $n\text{ADH}/n\text{CHO} = 0.5$ .

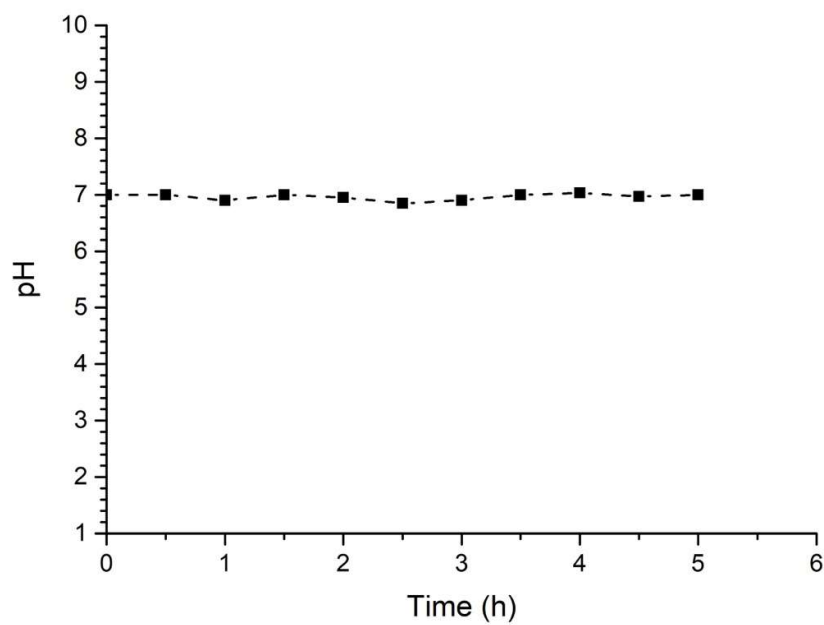

**Figure S2.** The change of leachate pH after merging ADH-OSA gel into ddH<sub>2</sub>O.

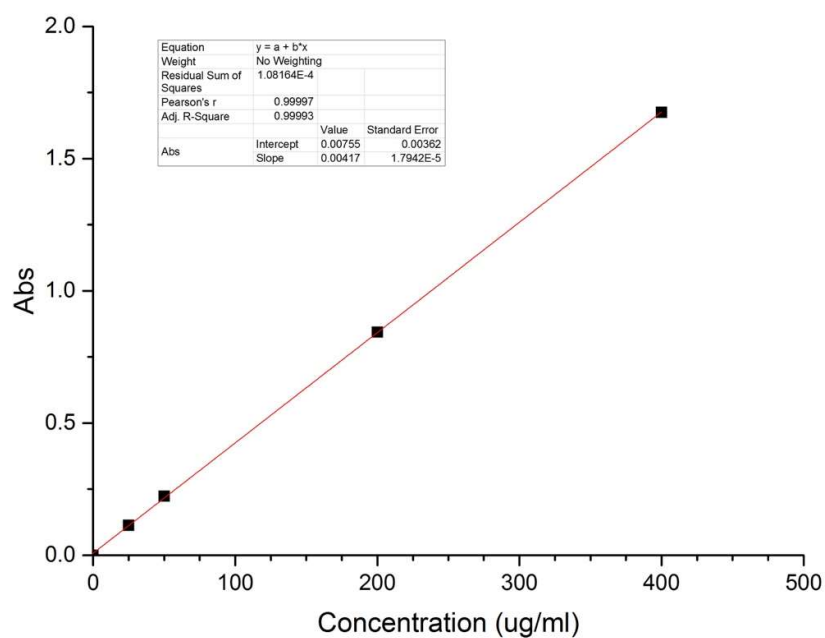

**Figure S3.** The standard curve of Tetramycin in ddH<sub>2</sub>O.

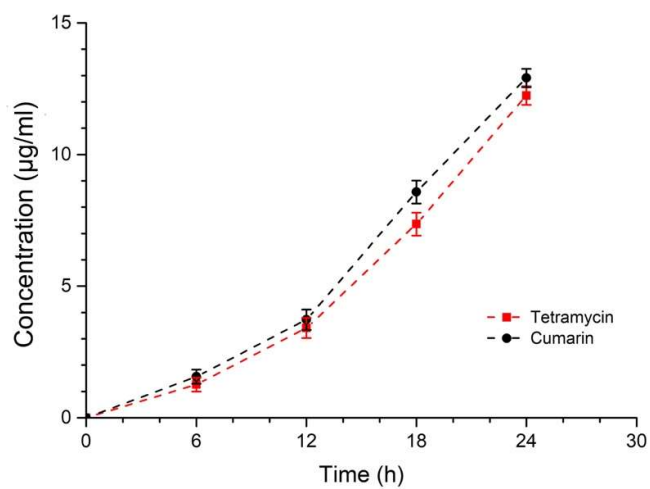

**Figure S4.** The releasing of tetramycin and coumarin loaded in the ADH-OSA gel, the pH of the solution was changed from 7 to 5 after merging the gel for 12 h.

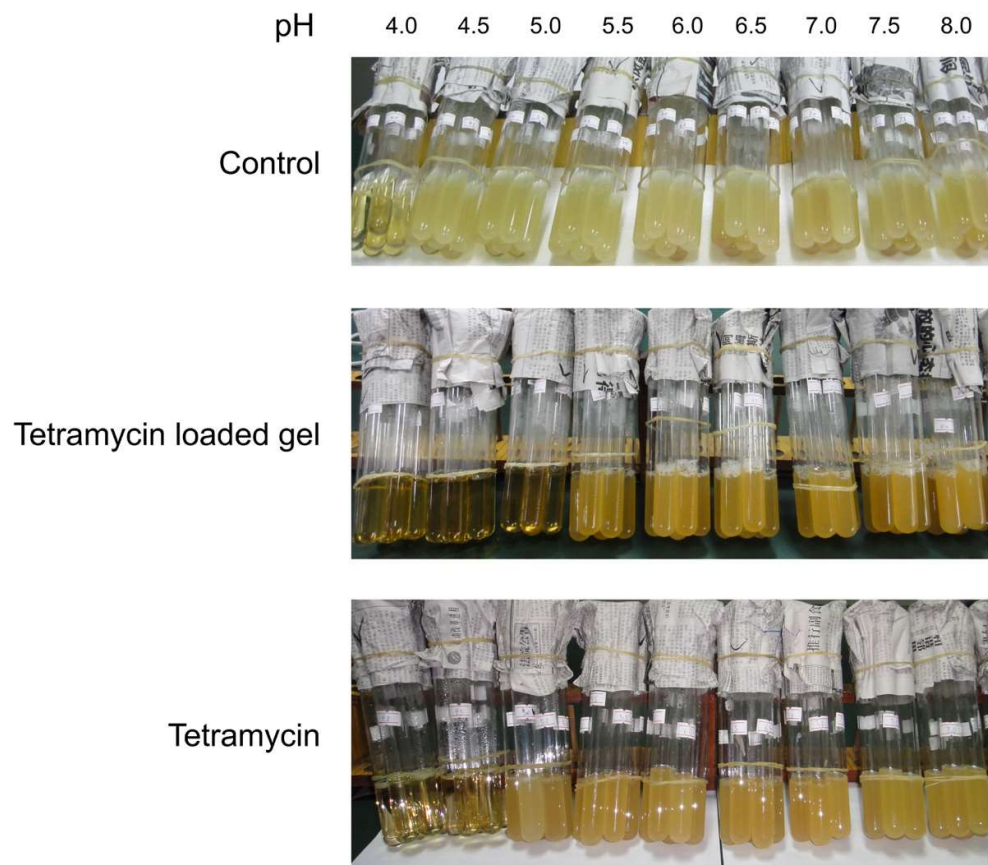

**Figure S5.** Images of *R. solanacearum* growth with tetramycin loaded gel and pure tetramycin respectively under different environmental pH.

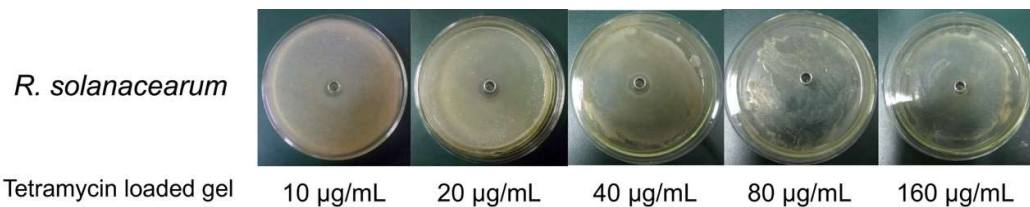

**Figure S6.** Images of Petri dish of *R. solanacearum* after being added tetramycin loaded gel, pure tetramycin and difenoconazole under different concentrations at pH 5.0.
